# Supplementary material
Source: publisher site journal article supplement (https://www.dovepress.com/article/434522)
Supplement: Supplementary file 1 [file get_supplementary_file.php]

**Supplementary Table 1** Immune-related Diseases of All Patients with Auricular Perichondritis

| **Immune-related diseases** | Cases |
| --- | --- |
| Bronchial asthma | 2 |
| Hashimoto thyroiditis | 2 |
| Myocarditis | 2 |
| Allergic rhinitis | 1 |
| Rheumatoid arthritis | 1 |
| Dermatitis | 1 |
| Systemic lupus erythematosus | 1 |

**Supplementary Table 2** Clinical Features of fungal and non-fungal auricular perichondritis

| Variables | Fungal infections patients | Non-fungal infections patients | *p-*value |
| --- | --- | --- | --- |
| (n = 11) | (n = 116) |
| Sex/male, n (%) | 3 (27.3%) | 54 (46.6%) | 0.362 |
| Age (years) | 59.4 ± 8.9 | 49.7 ± 17.2 | 0.072 |
| History of ear surgeries, n (%) | 7 (63.6%) | 41 (35.3%) | 0.127 |
| Diabetes mellitus, n (%) | 2 (18.2%) | 8 (6.9%) | 0.458 |
| Hypertension, n (%) | 3 (27.3%) | 17 (14.7%) | 0.506 |
| Immune-related comorbidities, n (%) | 4 (36.4%) | 6 (5.2%) | 0.002 |
| Required surgery, n (%) | 8 (72.7%) | 63 (54.3%) | 0.391 |
| Mean time to hospitalization (days) | 23.7 ± 8.5 | 18.5 ± 20.0 | 0.393 |
| Mean hospitalization length (days） | 29.1 ± 12.6 | 13.2 ± 13.2 | <0.001 |

**Supplementary Table 3** Previous Case Reports/Series (n≥5) about the Distribution of pathogenic microorganisms of Patients with Auricular Perichondritis

| **Study** | **Timeframe** | **Country/**  **Region** | **Cases**  **(n)** | **Etiology** | **Total isolates** | **Fungi %** | **G+ %** | **G-%** | **PA%** |
| --- | --- | --- | --- | --- | --- | --- | --- | --- | --- |
| Current study 2023 | 2013–2022 | China | 127 | Multiple | 61 | 23.0% | 21.3% | 55.7% | 49.2% |
| Klug 2019 1 | 1990–2018 | Denmark | 112 | Multiple | 49 | NT | 67.3% | 24.5% | 20.4% |
| Zhang 2015 2 | 2008–2014 | China | 82 | Multiple | 71 | 0.0% | 57.7% | 42.3% | 22.5% |
| Liu 2013 3 | 2001-2012 | UK | 10 | Piercing | 8 | NA | 0.0% | 100.0% | 100.0% |
| Davidi 2011 4 | 1987-2004 | Israel | 114 | Multiple | 45 | 2.2% | 33.3% | 64.4% | 55.6% |
| Prasad 2007 5 | Five-year period | India | 61 | Multiple | 66 | NT | 7.6% | 92.4% | 60.6% |
| Tseng 2006 6 | 1997–2002 | China (Taiwan) | 8 | Postoperative | 9 | 44.4% | 44.4% | 11.1% | 0.0% |
| Keene 2004 7 | 2000 | US | 7 | Piercing | 7 | NA | 0.0% | 100.0% | 100.0% |
| Cicchetti 2002 8 | NA | UK | 5 | Piercing | 4 | NA | 0.0% | 100.0% | 100.0% |
| Kent 2001 9 | 1998–1999 | UK | 10 | Piercing | 6 | NA | 0.0% | 100.0% | 100.0% |

**Abbreviations:**NT, not tested; NA, not available; G+, Gram-positive bacteria; G-, Gram-negative bacteria; PA, *Pseudomonas aeruginosa.*

**References**

1. Klug TE, Holm N, Greve T, Ovesen T. Perichondritis of the auricle: bacterial findings and clinical evaluation of different antibiotic regimens. *Eur Arch Otorhinolaryngol*. 2019;276(8):2199–2203.
2. Zhang F, Zhang Y, Bao Y. Pathogens of suppurative perichondritis of ear auricle and their clinical significances. *J Clin Otorhinolaryngol Head Neck Surg (China)*. 2015;29(2):168–170.
3. Liu ZW, Chokkalingam P. Piercing associated perichondritis of the pinna: are we treating it correctly? *J Laryngol Otol*. 2013;127(5):505–508.
4. Davidi E, Paz A, Duchman H, Luntz M, Potasman I. Perichondritis of the auricle: analysis of 114 cases. *Isr Med Assoc J.* 2011;13(1):21–24.
5. Prasad HK, Sreedharan S, Prasad HS, Meyyappan MH, Harsha KS. Perichondritis of the auricle and its management. *J Laryngol Otol.* 2007;121(6):530–534.
6. Tseng CC, Shiao AS. Postoperative auricular perichondritis after an endaural approach tympanoplasty. *J Chin Med Assoc.* 2006;69(9):423–427.
7. Keene WE, Markum AC, Samadpour M. Outbreak of Pseudomonas aeruginosa infections caused by commercial piercing of upper ear cartilage. *JAMA.* 2004;291(8):981–985.
8. Cicchetti S, Skillman J, Gault DT. Piercing the upper ear: a simple infection, a difficult reconstruction. *Br J Plast Surg.* 2002;55(3):194–197.
9. Kent SE, Rokade AV, Premraj K, Butcher C. "High" ear piercing and perichondritis of the pinna. *BMJ.* 2001;323(7309):400.
